# Supplementary material for: Zwitterionic oligomers of 3-aminobenzoic acid on screen-printed electrodes: structure, properties and forensic application
Source: Royal Society of Chemistry journal article supplement (doi:10.1039/d3an01700a), 2024-01-01
Supplement: d3an01700a1.pdf [file d3an01700a1.pdf]

## Electronic Supplementary Information

### Oral fluid sample preparation

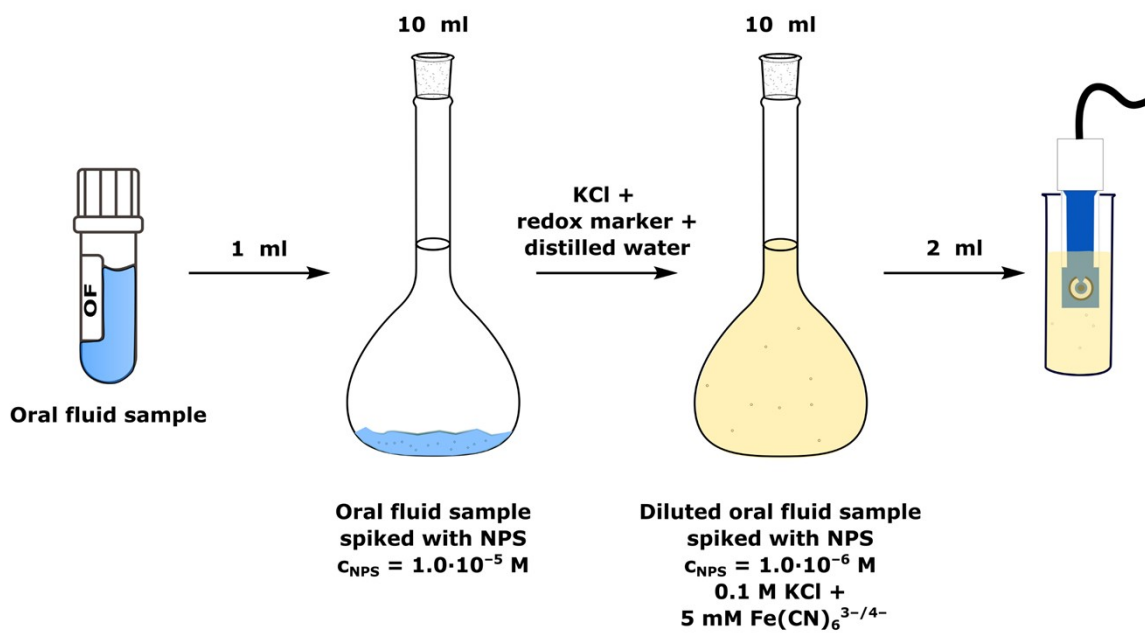

**Scheme S1** Experimental protocol of oral fluid sample preparation for impedance spectroscopy measurements with experimental o-3ABA-modified graphite screen-printed electrodes.

### Tentative structures of proposed oligomers 3ABA

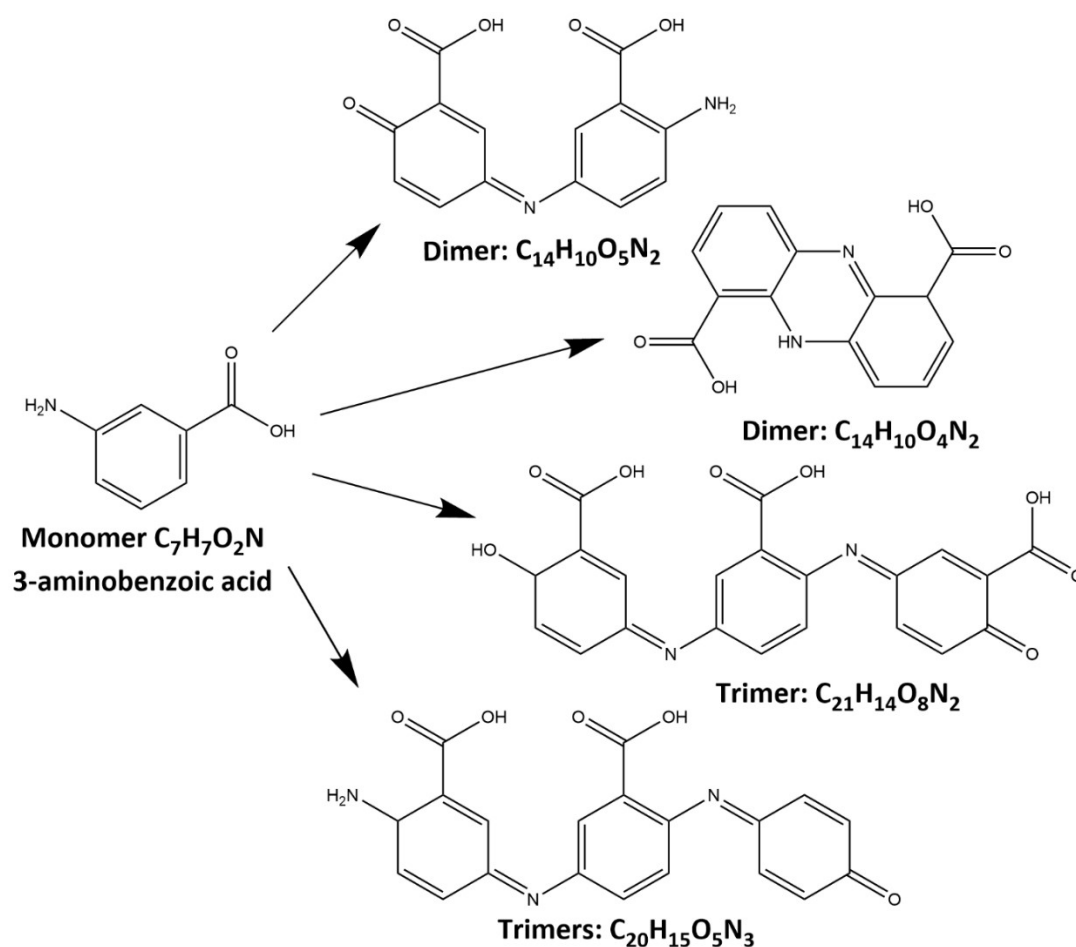

**Scheme S2** Proposed structures oligomers formed from electrochemically oxidized 3-aminobenzoic acid [34]

[34] T. V. Shishkanova, G. Broncová, Z. Němečková, V. Vrkoslav, V. Král and P. Matějka, *J. Electroanal. Chem.*, 2019, 832, 321-328.

### Raman spectroscopy

In the spectrum of aniline hydrochloride (Fig. S2), we observe peak situated at  $1634\text{ cm}^{-1}$  ( $NH_2$  deformation vibrations), at  $1602\text{ cm}^{-1}$  (the quadrant ring stretching vibrations), at  $1203\text{ cm}^{-1}$  (ring–N stretching vibrations), at  $1177\text{ cm}^{-1}$  (C–H in-plane bending vibrations), at  $1008\text{ cm}^{-1}$  (in-plane aromatic bending vibrations), at  $794\text{ cm}^{-1}$  (the quadrant in-plane bending vibrations), at  $619\text{ cm}^{-1}$  (C–H quadrant out-of-plane bending vibrations), and at  $407\text{ cm}^{-1}$  (out-of-plane deformations of the ring) [S1].

The Raman spectrum of PANI electrochemically deposited on the Au/SPE electrode (Fig. S1) corresponds to the typical spectrum of the protonated emeraldine form of polyaniline described in Encyclopaedia of Polymer Science and Technology and in [S1]. The peak observed at  $1602\text{ cm}^{-1}$  is connected with the C=C stretching vibrations in a quinonoid ring. The peak with maximum at approximately  $1513\text{ cm}^{-1}$  corresponds to the N–H deformation vibrations associated with the semiquinonoid structures. The band with maximum at  $1383\text{ cm}^{-1}$  belongs to the C–N<sup>+</sup> vibrations of localized polaronic structures and that at  $1335\text{ cm}^{-1}$  to the delocalized polarons. The amount of the localized polarons is higher in comparison to the standard PANI. Quinonoid-ring deformation vibrations correspond to the band situated at  $1230\text{ cm}^{-1}$ . The band with maximum at  $1176\text{ cm}^{-1}$

belongs to the C–H in-plane bending vibrations of the semi-quinonoid or benzenoid rings. The band situated at  $810\text{ cm}^{-1}$  is linked to the benzene-ring deformations and the band observed at  $578\text{ cm}^{-1}$  can be linked to the amine deformation vibrations (in-plane) of the emeraldine salt structure. The out-of-plane deformations of the ring are connected with the bands located at  $520$  and  $430\text{ cm}^{-1}$ .

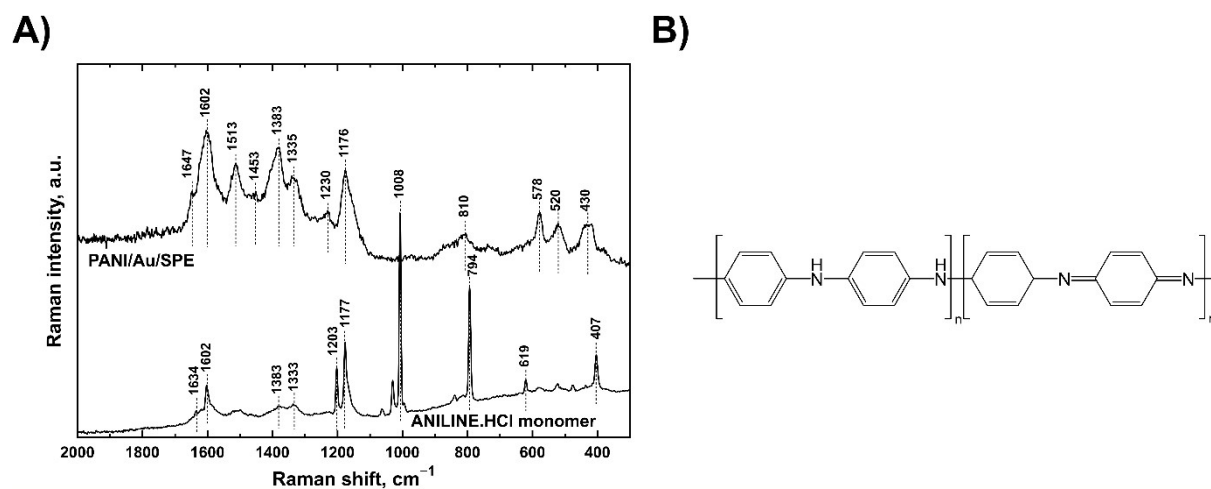

**Fig. S1** Dispersive Raman spectra obtained on gold screen-printed electrodes modified with polymerization product of aniline and of the corresponding monomer (A) and the structure of polyaniline.

[S1] J. Stejskal, M. Trchová, P. Bober, P. Humpolíček, V. Kašpárková, I. Sapurina, M. A. Shishov and M. Varga, in *Encyclopedia of Polymer Science and Technology*, 2015, pp. 1-44.

### Analytical applicability of o-3ABA modified electrodes: Analytical parameters

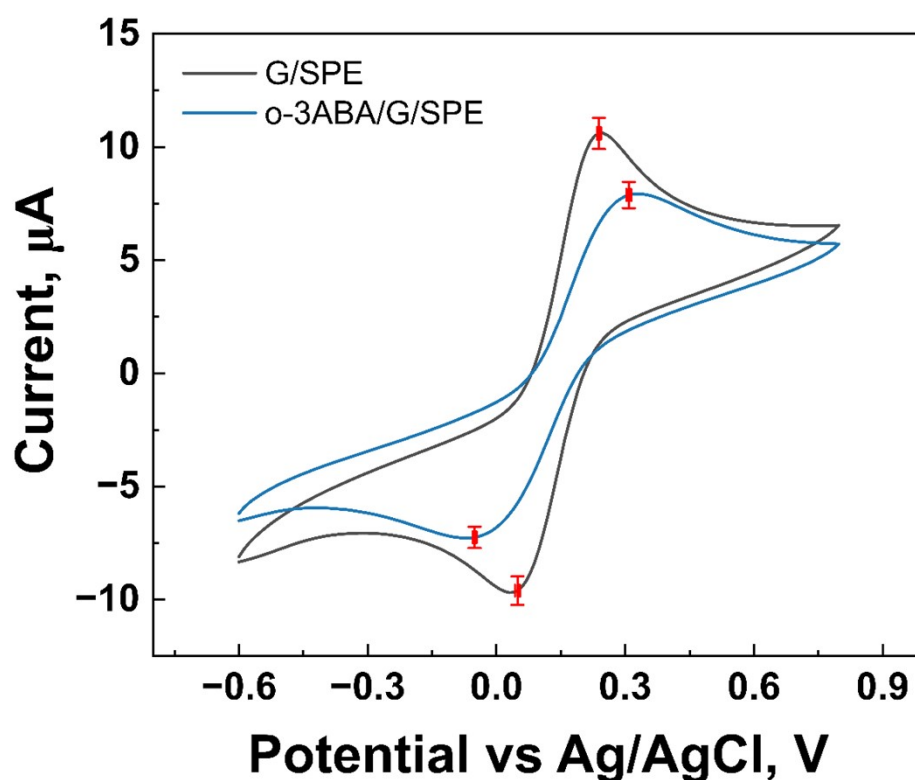

**Fig. S2** Testing and comparing repeatability of electrochemical signal obtained before and after modification of graphite screen-printed electrode with 3-aminobenzoic acid oligomers (n=5). Experimental conditions: 5 mM  $\text{Fe}(\text{CN})_6^{3-/4-}$  solution containing 0.1 M KCl

**Table S1** Parameters of cyclic voltammograms obtained during measurement with unmodified and o-3ABA-modified electrodes (n=5).

|                      | Before modification |               | After modification |               |
|----------------------|---------------------|---------------|--------------------|---------------|
|                      | Anodic peak         | Cathodic peak | Anodic peak        | Cathodic peak |
| <b>Potential, mV</b> | 236.5 ± 4.5         | 42.9 ± 5.5    | 302.5 ± 5.5        | -32.9 ± 4.5   |
| <b>Current, µA</b>   | 10.83 ± 0.69        | -10.13 ± 0.63 | 7.07 ± 0.58        | -6.79 ± 0.47  |

**Table S2** Reproducibility of electrochemical signal obtained for o-3ABA-modified electrodes (n=3) in model samples

| Concentration (µM) | log ( $c_{\text{NPS}}$ ) | 2-aminoindane   |         | butylone       |         |
|--------------------|--------------------------|-----------------|---------|----------------|---------|
|                    |                          | CPE (nF)        | RSD (%) | CPE (nF)       | RSD (%) |
| 1.00               | -6.00                    | 868.11 ± 119.51 | 13.77   | 644.67 ± 88.13 | 13.67   |
| 3.00               | -5.52                    | 731.59 ± 84.40  | 11.54   | 632.87 ± 70.04 | 11.07   |
| 5.00               | -5.30                    | 699.50 ± 72.62  | 10.38   | 617.53 ± 53.37 | 8.64    |

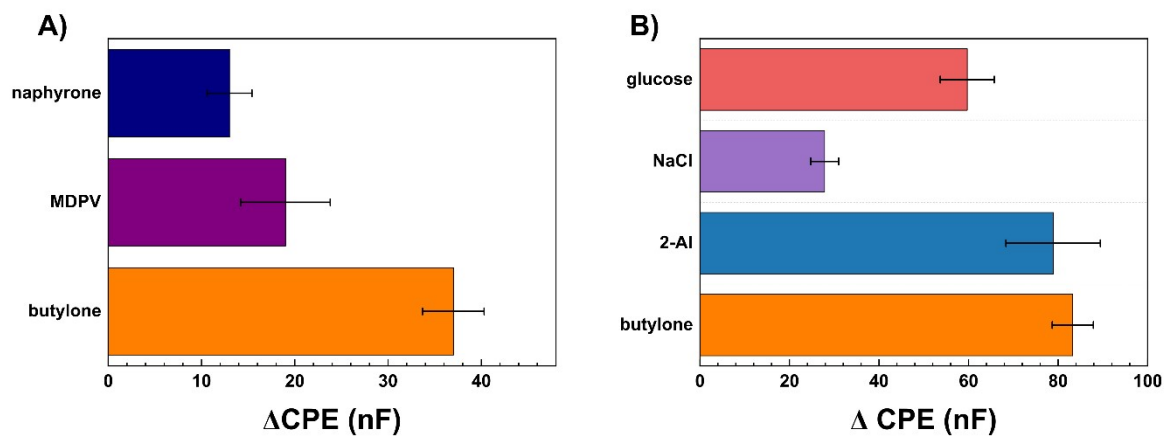

**Fig. S3** Influence of synthetic cathinones (A) and substances present in oral fluid samples (B) on the electrochemical signal of o-3ABA/G/SPE.

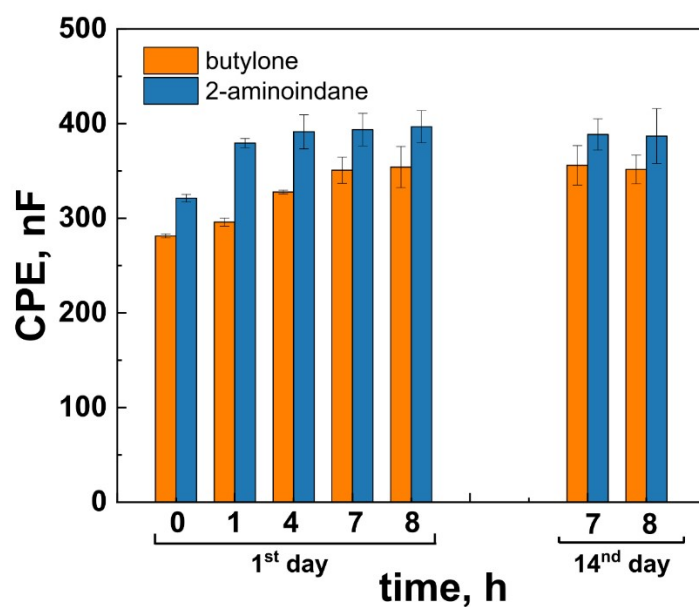

**Fig. S4** Inter-day stability of the o-3ABA modified G/SPE electrodes with 1 mM concentration of the analyte (n=3).

## Analytical applicability of o-3ABA modified electrodes: Analysis of model and oral fluid samples

### Determination of NPS in model samples and oral fluid

**Table S3** The experimental data obtained with the determination of chosen new psychoactive substances ( $c = 1.0 \cdot 10^{-6}$  M) in model samples and oral fluid

| Concentration ( $\mu$ M) | $\log(c_{\text{NPS}})$ | Model sample  |          | Oral fluid sample |          |
|--------------------------|------------------------|---------------|----------|-------------------|----------|
|                          |                        | 2-aminoindane | butylone | 2-aminoindane     | butylone |
|                          |                        | CPE (nF)      |          | CPE (nF)          |          |
| 1.00                     | -6.00                  | 801.6         | 581.8    | 678.9             | 878.2    |
| 2.00                     | -5.70                  | 770.7         | 559.1    | 640.7             | 863.6    |
| 3.00                     | -5.52                  | 756.9         | 545.0    | 622.6             | 848.9    |
| 4.00                     | -5.40                  | 736.5         | 530.0    | 601.6             | 842.1    |
| 5.00                     | -5.30                  | 726.4         | 522.6    | 596.4             | 837.0    |
| 6.00                     | -5.22                  | 719.7         | 521.6    | 588.6             | 833.9    |

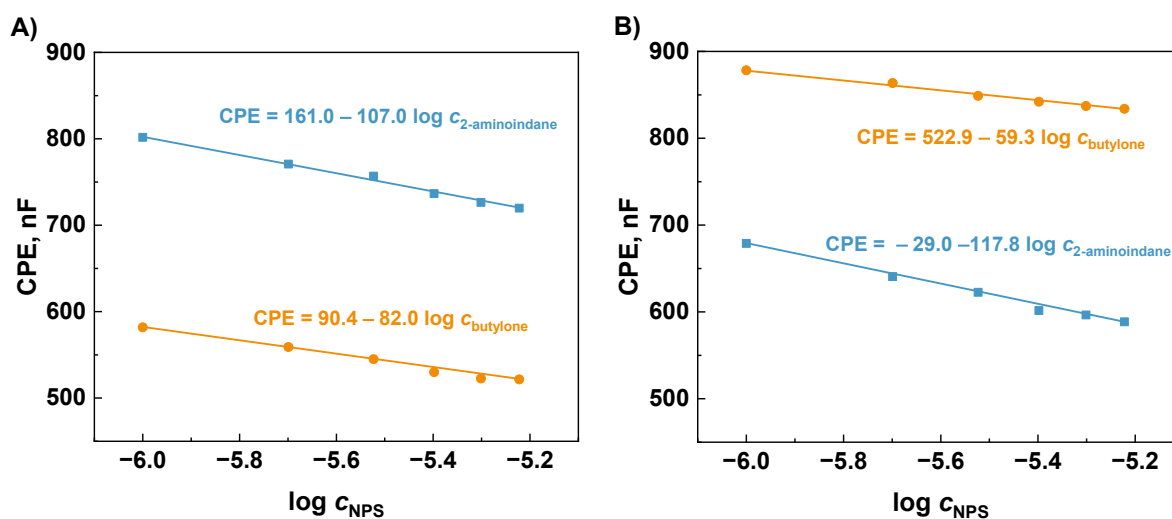

**Fig. S5** The concentration dependences obtained with the determination of chosen new psychoactive substances in model samples (A) and oral fluid (B)
